# Supplementary material for: Genetic Determinants and Prediction of Antibiotic Resistance Phenotypes in Helicobacter pylori
Source: J Clin Med. 2019 Jan 7;8(1):53. doi: 10.3390/jcm8010053 (PMC6351930; doi:10.3390/jcm8010053)
Supplement: Supplementary file 1 [file jcm-08-00053-s001.docx]

**Supplementary Information**

Article

Genetic Determinants and Prediction of Antibiotic Resistance Phenotypes in *Helicobacter pylori*

Francis N. Lauener 1,†, Frank Imkamp 1,†, Philippe Lehours 2,3, Alice Buissonnière 2,3,
Lucie Benejat 2,3, Reinhard Zbinden 1, Peter M. Keller 1,4 and Karoline Wagner 1,*,‡

1 Institute of Medical Microbiology, University of Zurich, 8006 Zurich, Switzerland; francisnicolai.lauener@uzh.ch (F.N.L.); imkamp@imm.uzh.ch (K.I.); rzbinden@imm.uzh.ch (R.Z.); pkeller@imm.uzh.ch (P.M.K.)

2 INSERM UMR1053, Bordeaux Research in Translational Oncology, BaRITOn, Université de Bordeaux, 33076 Bordeaux, France; philippe.lehours@u-bordeaux.fr (P.L.); alice.buissonniere@chu-bordeaux.fr (A.B.); lucie.bruhl@chu-bordeaux.fr (L.B.)

3 French National Reference Centre for *Campylobacter* and *Helicobacter*, Bordeaux Hospital, 33076 Bordeaux, France

4 Institute for Infectious Diseases, University of Bern, 3001 Bern, Switzerland

***** Correspondence: karoline.wagner@usb.ch; Tel.: +41612073262

† These authors contributed equally to the manuscript

‡ Current affiliation: Division of Infection Diagnostics, Department of Biomedicine, University of Basel, Petersplatz 10, 4051 Basel, Switzerland

Received: 5 December 2018; Accepted: 31 December 2018; Published: date

**Supplementary Figures**


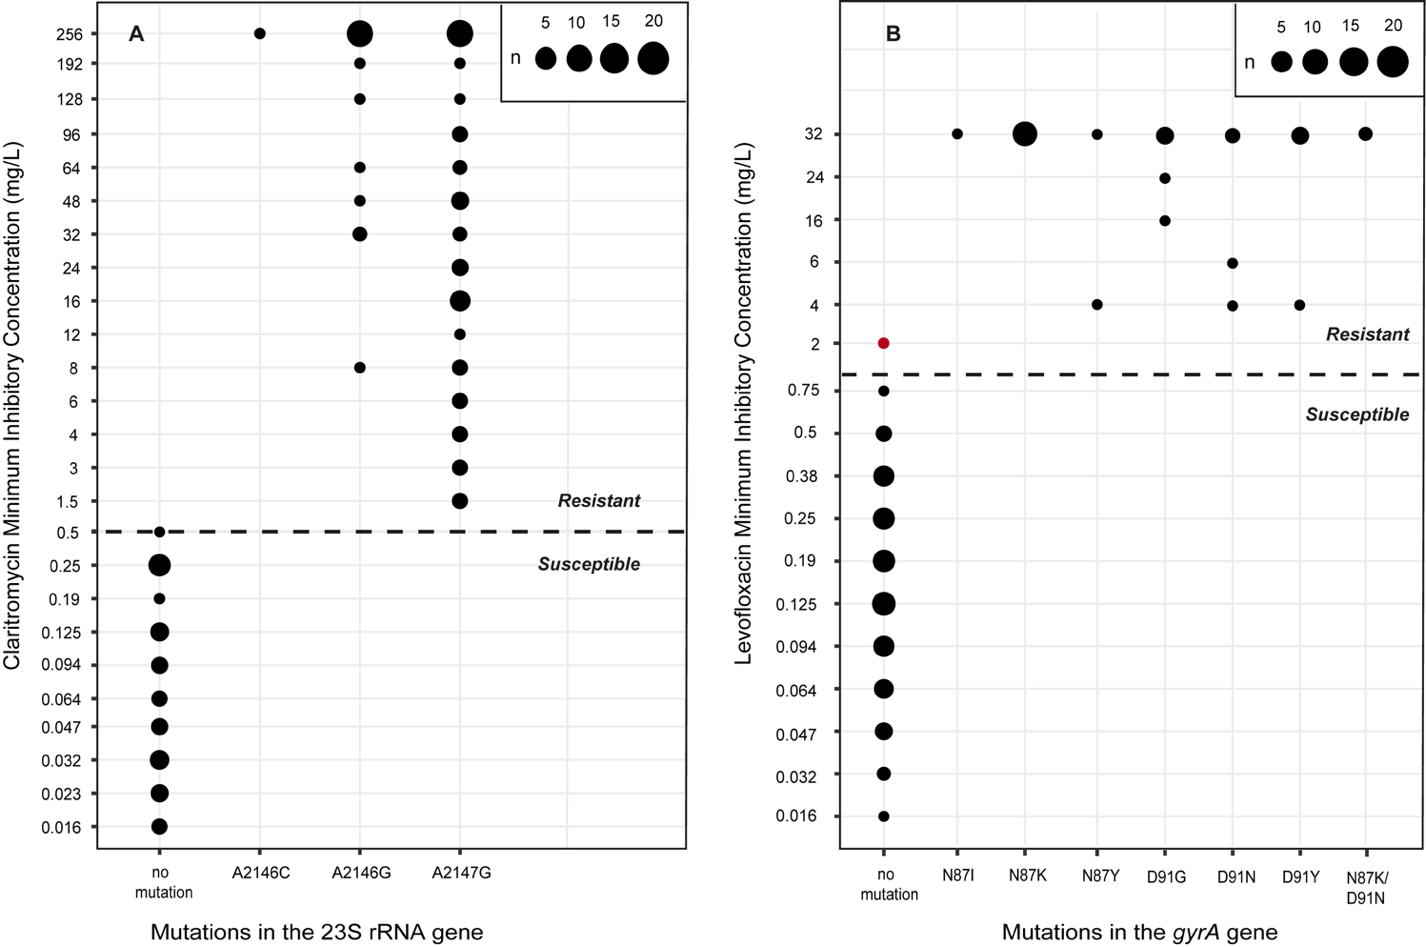


Figure S1. Association between phenotypic drug resistance and mutations in the 23S rRNA gene at nucleotide positions A2146 and A2147 (panel A) and mutations in the *gyrA* QRDR (panel B). One discrepant *H. pylori* isolate showing phenotypic levofloxacin resistance without mutations in the *gyrA* QRDR is displayed in red.

**Supplementary Tables**

Table S1. *H. pylori* isolates showing discrepant phenotypic DST and WGS results were sent to the *H. pylori* reference centre in Bordeaux, France, for culture based phenotypic DST.

|  | **MIC (mg/L)** | |  | **WGS** | |
| --- | --- | --- | --- | --- | --- |
| **Drug** | **IMM** | **Bordeaux** |  | **Gene** | **Mutation** |
| Clarithromycin | 0.5 | 0.5 and >256 |  | 23S rRNA | A2146G |
| 0.5 | 0.19 and 6 |  | 23S rRNA | A2147G |
| 1.5 | 0.5 |  | 23S rRNA | T2182 |
| Levofloxacin | 2.0 | 1.5 |  | *gyrA* | - |
| 2.0 | nd |  | *gyrA* | - |
| 4.0 | nd |  | *gyrA* | - |
| nd these two *H. pylori* strains could not be regrown and were subsequently not sent  for discrepancy analysis to the *H. pylori* reference centre in Bordeaux | | | | | |

Table S2. Comparison of frameshift mutations and SNPs detected in the *frxA* gene of metronidazole susceptible and resistant *H. pylori* isolates.

| **Gene** | **Codon1** | **Number of susceptible**  ***H. pylori* isolates** |  | **Number of resistant *H. pylori* isolates** | **Reference** |
| --- | --- | --- | --- | --- | --- |
| *frxA* | 105 (frameshift) | - |  | 1 | Frameshifts in *frxA* suggested to confer  metronidazole resistance [4] |
| 149 (frameshift) | - |  | 1 |
| 192 (frameshift) | - |  | 1 |
| 18 (frameshift) | 14 |  | 46 | These frameshifts have not been previously reported in the literature |
| A16T | 3 |  | 5 |
| A32V | 2 |  | 3 |
| A85V | - |  | 3 |
| I44F | - |  | 3 |
| I117M | 1 |  | 3 |
| M126F | 1 |  | 2 |
| S43A | - |  | 3 |
| V7I | 2 |  | 3 |
| Y62D | 4 |  | 5 |
| 1 Just amino acid exchanges and frameshift mutations that occurred more frequently in metronidazole resistant  than in susceptible *H. pylori* isolates are displayed. | | | | | |

Table S3. Comparison of frameshift mutations and truncations detected in the *rdxA* gene of metronidazole susceptible and resistant *H. pylori* isolates.

| **Gene** | **Codon1** | **Number of susceptible *H. pylori* isolates** | **Number of resistant *H. pylori* isolates** | **Reference** |
| --- | --- | --- | --- | --- |
| *rdxA* | 18  (frameshift) | - | 2 | Frameshifts in *rdxA*  suggested to confer  metronidazole resistance  [4] |
| 38  (frameshift) | - | 1 |
| 112 (frameshift) | - | 1 |
| 190 (frameshift) | - | 1 |
| 50  (truncation) | - | 2 | truncation leads to  metronidazole resistance [5] |
| 31  (truncation) | - | 1 | Truncations in *rdxA*  suggested to lead to  metronidazole resistance [5] |
| 119 (truncation) | - | 1 |
| 146 (truncation) | - | 1 |
| 96  (frameshift) | 3 | 4 | These frameshifts have not been previously reported in the literature |
| 62  (frameshift) | 1 | 3 |
| 162 (frameshift) | 1 | 1 |
| 1 Just frameshift mutations that occurred more frequently in metronidazole resistant than in  susceptible *H. pylori* isolates are displayed. | | | | |

Table S4. Comparison of SNPs detected in the *rdxA* gene of metronidazole susceptible and resistant *H. pylori* isolates.

| **Gene** | **Codon1** |  | **Number of susceptible *H. pylori* isolates** |  | **Number of resistant *H. pylori* isolates** | **Reference** |
| --- | --- | --- | --- | --- | --- | --- |
| *rdxA* | R16C |  | - |  | 10 | R16C occurs only in metronidazole resistant *H. pylori* strains [6-8] |
| K64N |  | - |  | 6 | K64N occurs solely in metronidazole resistant *H. pylori* strains [9] |
| P106S |  | - |  | 6 | P106S occurs solely in metronidazole resistant *H. pylori* strains [9] |
| A67V |  | - |  | 5 | A67V occurs solely in metronidazole resistant *H. pylori* strains [10] |
| A68E |  | - |  | 3 | A68T occurs solely in metronidazole resistant *H. pylori* strains [9] |
| D59N |  | 55 |  | 81 | These mutations have been previously reported in metronidazole susceptible and resistant *H. pylori* strains [9] |
| R90K |  | 19 |  | 37 |
| R131K |  | 28 |  | 33 |
| T31E |  | 19 |  | 30 |
| A118T |  | 16 |  | 22 |
| H97Y |  | 8 |  | 14 |
| G98S |  | 11 |  | 10 |
| A68V |  | 5 |  | 8 |
| L62V |  | 4 |  | 7 |
| M56I |  | 4 |  | 7 |
| R16H |  | 2 |  | 7 |
| V204I |  | 3 |  | 4 |
| M56V |  | - |  | 2 |
| V111A |  | 2 |  | 5 | These SNPs have not been previously reported in the literature |
| A183V |  | 5 |  | 9 |
| M21T |  | - |  | 3 |
| P44L |  | - |  | 3 |
| Q197K |  | 2 |  | 3 |
| S30R |  | 2 |  | 3 |
| S45R |  | - |  | 3 |
| A206T |  | - |  | 2 |
| H25R |  | - |  | 2 |
| L185Y |  | - |  | 2 |
| L188V |  | - |  | 2 |
| 1 Just amino acid exchanges and frameshift mutations that occurred more frequently in metronidazole resistant  than in susceptible *H. pylori* isolates are displayed. | | | | | | |

Table S5. List of all frameshift mutations and SNPs detected in the *frxA* gene of metronidazole susceptible and resistant *H. pylori* isolates.

| **Gene** | **Codon** |  | **MIC**  **≤8 mg/L1** | **MIC**  **>8 mg/L2** | |
| --- | --- | --- | --- | --- | --- |
| *frxA* | 18 | Frameshift | 0.016 | 256 | |
| 105 | Frameshift | - | 256 | |
| 149 | Frameshift | - | 256 | |
| 192 | Frameshift | - | 24 | |
| A153V | Amino acid exchange | - | 256 | |
| A15V | Amino acid exchange | - | 256 | |
| A16T | Amino acid exchange | 0.016 | 256 | |
| A32V | Amino acid exchange | - | 256 | |
| A40S | Amino acid exchange | 0.38 | 256 | |
| A67V | Amino acid exchange | 1.5 | - | |
| A70V | Amino acid exchange | 0.5 | - | |
| A85V | Amino acid exchange | 16 | 128 | |
| C193S | Amino acid exchange | 0.064 | 256 | |
| C19T | Amino acid exchange | - | 256 | |
| D109G | Amino acid exchange | - | 24 | |
| D109N | Amino acid exchange | - | 32 | |
| D94N | Amino acid exchange | 0.38 | - | |
| E164K | Amino acid exchange | - | 256 | |
| E169K | Amino acid exchange | - | 256 | |
| E176K | Amino acid exchange | 0.064 | 256 | |
| E177K | Amino acid exchange | 0.5 | - | |
| E75D | Amino acid exchange | 0.19 | 256 | |
| F72S | Amino acid exchange | 0.064 | 256 | |
| G73S | Amino acid exchange | 0.064 | 256 | |
| G76A | Amino acid exchange | 0.094 | 256 | |
| I117M | Amino acid exchange | 0.75 | 256 | |
| I118F | Amino acid exchange | 0.38 | - | |
| I144V | Amino acid exchange | 1 | - | |
| I44F | Amino acid exchange | 24 | 256 | |
| K208N | Amino acid exchange | 0.75 | 24 | |
| M155I | Amino acid exchange | 0.064 | - | |
| N111D | Amino acid exchange | 0.064 | 256 | |
| N111H | Amino acid exchange | - | 16 | |
| N124S | Amino acid exchange | 0.064 | 256 | |
| N182D | Amino acid exchange | 0.75 | - | |
| Q27E | Amino acid exchange | 32 | 256 | |
| R38K | Amino acid exchange | 0.25 | 0.38 | |
| R86Q | Amino acid exchange | 0.25 | - | |
| S43A | Amino acid exchange | 24 | 256 | |
| S93N | Amino acid exchange | 0.75 | - | |
| T110A | Amino acid exchange | 0.064 | - | |
| V34I | Amino acid exchange | 0.38 | 256 | |
| **Gene** | **Codon** |  | **MIC**  **≤8 mg/L1** | **MIC**  **>8 mg/L2** | |
| *frxA* | V6I | Amino acid exchange | 1 | - | |
| V7I | Amino acid exchange | 0.19 | 256 | |
| V7L | Amino acid exchange | 0.064 | - | |
| V96I | Amino acid exchange | 0.19 | - | |
| 1 If the same amino acid exchange was identified in multiple *H. pylori* strains with a  metronidazole susceptible phenotype, the lowest MIC is displayed  2 If the same amino acid exchange was identified in multiple *H. pylori* strains with a  metronidazole resistant phenotype, the highest MIC is displayed | | | | |
|  |  |  |  |  | |

Table S6. List of all frameshift mutations and SNPs detected in the *rdxA* gene of metronidazole susceptible and resistant *H. pylori* isolates.

| **Gene** | **Codon** |  | **MIC**  **≤8 mg/L1** | **MIC**  **>8 mg/L2** | |
| --- | --- | --- | --- | --- | --- |
| *rdxA* | 18 | Frameshift | - | 256 | |
| 38 | Frameshift | - | 256 | |
| 43 | Frameshift | - | 256 | |
| 61 | Frameshift | - | 256 | |
| 62 | Frameshift | - | 256 | |
| 75 | Frameshift | - | 256 | |
| 96 | Frameshift | 0.094 | 256 | |
| 97 | Frameshift | 0.19 | 256 | |
| 112 | Frameshift | - | 256 | |
| 138 | Frameshift | 0.016 | 256 | |
| 162 | Frameshift | 0.5 | 256 | |
| 190 | Frameshift |  | 256 | |
| 50 | Truncation | 0.094 | 256 | |
| 119 | Truncation | - | 256 | |
| 146 | Truncation | - | 256 | |
| A118S | Amino acid exchange | 0.016 | 256 | |
| A118T | Amino acid exchange | 0.016 | 256 | |
| A183V | Amino acid exchange | 0.016 | 256 | |
| A193T | Amino acid exchange | - | 256 | |
| A195V | Amino acid exchange | - | 256 | |
| A206T | Amino acid exchange | - | 256 | |
| A299G | Amino acid exchange | - | 256 | |
| A37V | Amino acid exchange | - | 256 | |
| A465G | Amino acid exchange | 0.5 | - | |
| A633G | Amino acid exchange | - | 256 | |
| A67V | Amino acid exchange | - | 256 | |
| A68E | Amino acid exchange | - | 256 | |
| A68T | Amino acid exchange | 0.064 | 256 | |
| A68V | Amino acid exchange | 0.125 | 256 | |
| A80T | Amino acid exchange | 0.38 | 256 | |
| A82S | Amino acid exchange | 0.19 | - | |
| A91G | Amino acid exchange | - | 256 | |
| C131T | Amino acid exchange | - | 256 | |
| C140F | Amino acid exchange | - | 256 | |
| C140Y | Amino acid exchange | 3 | 256 | |
| C148T | Amino acid exchange | - | 256 | |
| C19Y | Amino acid exchange | - | 256 | |
| C378T | Amino acid exchange | 0.5 | - | |
| C381T | Amino acid exchange | 0.5 | - | |
| C46T | Amino acid exchange | - | 256 | |
| C92A | Amino acid exchange | - | 256 | |
| D205A | Amino acid exchange | - | 256 | |
| **Gene** | **Codon** |  | **MIC**  **≤8 mg/L1** | **MIC**  **>8 mg/L2** | |
| *rdxA* | D59N | Amino acid exchange | 0.016 | 256 | |
| D5N | Amino acid exchange | 0.064 | - | |
| D61N | Amino acid exchange | - | 256 | |
| E175Q | Amino acid exchange | 0.25 | 256 | |
| E194G | Amino acid exchange | - | 256 | |
| E27T | Amino acid exchange | 0.25 | - | |
| E34G | Amino acid exchange | 0.75 | - | |
| E74G | Amino acid exchange | - | 256 | |
| F3I | Amino acid exchange | - | 256 | |
| G122S | Amino acid exchange | 0.75 | 256 | |
| G123A | Amino acid exchange | 3 | - | |
| G163V | Amino acid exchange | - | 256 | |
| G170S | Amino acid exchange | 0.016 | 256 | |
| G189C | Amino acid exchange | - | 256 | |
| G225A | Amino acid exchange | - | 256 | |
| G392A | Amino acid exchange | - | 256 | |
| G434A | Amino acid exchange | - | 256 | |
| G476A | Amino acid exchange | - | 256 | |
| G47A | Amino acid exchange | 0.19 | 256 | |
| G504A | Amino acid exchange | 0.5 | - | |
| G523C | Amino acid exchange | 0.5 | - | |
| G618A | Amino acid exchange | - | 256 | |
| G98S | Amino acid exchange | 0.064 | 256 | |
| H25R | Amino acid exchange | - | 256 | |
| H53R | Amino acid exchange | 0.064 | 256 | |
| H53Y | Amino acid exchange | 0.25 | - | |
| H69R | Amino acid exchange | - | 256 | |
| H69Y | Amino acid exchange | 0.125 | - | |
| H97Y | Amino acid exchange | 0.016 | 256 | |
| K110R | Amino acid exchange | 0.016 | - | |
| K179R | Amino acid exchange | 0.125 | - | |
| K60R | Amino acid exchange | - | 24 | |
| K64N | Amino acid exchange | 3 | 256 | |
| K64R | Amino acid exchange | 1 | - | |
| L121F | Amino acid exchange | - | 256 | |
| L167S | Amino acid exchange | - | 82 | |
| L185Y | Amino acid exchange | - | 256 | |
| L188V | Amino acid exchange | - | 256 | |
| L62V | Amino acid exchange | 0.064 | 256 | |
| M56I | Amino acid exchange | 0.094 | 256 | |
| M56V | Amino acid exchange | - | 256 | |
| M84I | Amino acid exchange | 0.75 | - | |
| P106L | Amino acid exchange | - | 256 | |
| P106S | Amino acid exchange | 0.5 | 256 | |
| P115L | Amino acid exchange | - | 256 | |
| P166L | Amino acid exchange | - | 256 | |
| **Gene** | **Codon** |  | **MIC**  **≤8 mg/L1** | **MIC**  **>8 mg/L2** | |
| *rdxA* | P44L | Amino acid exchange | - | 256 | |
| P44S | Amino acid exchange | 0.96 | - | |
| P91S | Amino acid exchange | 0.25 | - | |
| Q139K | Amino acid exchange | - | 256 | |
| Q139R | Amino acid exchange | - | 256 | |
| Q197K | Amino acid exchange | 0.25 | 256 | |
| Q6H | Amino acid exchange | 0.125 | 256 | |
| R131K | Amino acid exchange | 0.016 | 256 | |
| R16C | Amino acid exchange | - | 256 | |
| R176H | Amino acid exchange | - | 256 | |
| R41K | Amino acid exchange | - | 256 | |
| R90K | Amino acid exchange | 0.016 | 256 | |
| S108A | Amino acid exchange | 0.25 | 128 | |
| S30R | Amino acid exchange | 0.016 | 256 | |
| S45R | Amino acid exchange | - | 256 | |
| S81L | Amino acid exchange | - | 256 | |
| S88P | Amino acid exchange | 0.064 | 256 | |
| T31A | Amino acid exchange | 1 | - | |
| T31E | Amino acid exchange | 0.016 | 256 | |
| T58A | Amino acid exchange | 0.5 | - | |
| V111A | Amino acid exchange | 0.5 | 256 | |
| V111I | Amino acid exchange | - | 256 | |
| V172I | Amino acid exchange | 0.064 | 256 | |
| V204I | Amino acid exchange | 0.25 | 256 | |
| 1 If the same amino acid exchange was identified in multiple *H. pylori* strains with a  metronidazole susceptible phenotype, the lowest MIC is displayed  2 If the same amino acid exchange was identified in multiple *H. pylori* strains with a  Metronidazole resistant phenotype, the highest MIC is displayed | | | | |

Table S7. List of all SNPs detected in the *gyrA* and *gyrB* genes of the discrepant *H. pylori* isolate showing a levofloxacin resistant phenotype.

| **Discrepant *H. pylori* isolate** | **Levofloxacin MIC (mg/L)** | |  | **WGS** | |
| --- | --- | --- | --- | --- | --- |
| **IMM Zurich** | **Bordeaux** |  | **Amino acid exchanges**  **in *gyrA*** | **Amino acid exchanges**  **in *gyrB*** |
| *H. pylori* isolate 1 | 2.0 | 1.5 |  | M191I | T149I |
|  | V199A | I238V |
|  | G208E | A283T |
|  | I234V | G298D |
|  | H354R | R349H |
|  | R397Q | R484K |
|  | N495S | S546G |
|  | I498T | R579H |
|  | Y513H | L601F |
|  | A524V | T644A |
|  | D610N | N669H |
|  | E632G | H698Y |
|  | S633G |  |
|  | S652G |  |
|  | E679D |  |
|  | K694R |  |
|  | G733E |  |
|  | M803V |  |
|  | A272G |  |
|  | G849A |  |

**Availability of Data and Material:** Whole genome sequences of the *H. pylori* strains analysed in this study are available on NCBI under accession numbers:

RJDZ00000000, RJEA00000000, RJEB00000000, RJEC00000000, RJED00000000, RJEE00000000, RJEF00000000, RJEG00000000, RJEH00000000, RJEI00000000, RJEJ00000000, JEL00000000, RJEM00000000, RJEN00000000, RJEO00000000,

RJEP00000000, RJEQ00000000, RJER00000000, RJES00000000, RJET00000000, RJEU00000000, RJEV00000000, RJEW00000000, RJEX00000000, RJEY00000000,

RJEZ00000000, RJFA00000000, RJFB00000000, RJFC00000000, RJFD00000000,

RJFE00000000, RJFF00000000, RJFG00000000, RJFH00000000, RJFI00000000,

RJFJ00000000, RJFK00000000, RJFL00000000, RJFM00000000, RJFN00000000,

RJFO00000000, RJFP00000000, RJFQ00000000, RJFR00000000, RJFS00000000,

RJFT00000000, RJFU00000000, RJFV00000000, RJFW00000000, RJFX00000000,

RJFY00000000, RJFZ00000000, RJGA00000000, RJGB00000000, RJGC00000000,

RJGD00000000, RJGE00000000, RJGF00000000, RJGG00000000, RJGH00000000,

RJGI00000000, RJGJ00000000, RJGK00000000, RJGL00000000, RJGM00000000,

RJGN00000000, RJGO00000000, RJGP00000000, RJGQ00000000, RJGR00000000,

RJGS00000000, RJGT00000000, RJGU00000000, RJGV00000000, RJGW00000000,

RJGX00000000, RJGY00000000, RJGZ00000000, RJHA00000000, RJHB00000000,

RJHC00000000, RJHD00000000, RJHE00000000, RJHF00000000, RJHG00000000,

RJHH00000000RJHI00000000, RJHJ00000000, RJHK00000000, RJHL00000000,

RJHM00000000, RJHN00000000, RJHO00000000, RJHP00000000, RJHQ00000000,

RJHR00000000, RJHS00000000, RJHT00000000, RJHU00000000, RJHV00000000,

RJHW00000000, RJHX00000000, RJHY00000000, RJHZ00000000, RJIA00000000,

RJIB00000000, RJIC00000000, RJID00000000, RJIE00000000, RJIF00000000,

RJIG00000000, RJIH00000000, RJII00000000, RJIJ00000000, RJIK00000000,

RJIL00000000, RJIM00000000, RJIN00000000, RJIO00000000, RJIP00000000,

RJIQ00000000, RJIR00000000, RJIS00000000, RJIT00000000, RJIU00000000,

RJIV00000000, RJIW00000000, RJIX00000000, RJIY00000000, RJIZ00000000.

**References**

1. EUCAST. Breakpoint tables for interpretation of MICs and zone diameters. Version 8.0. http://www.eucast.org. 2018.
2. CASFM/EUCAST. http://www.sfm-microbiologie.org/UserFiles/ files/casfm/CASFMV1_0_MARS_2018.pdf. 2018.

3. Hays C, Burucoa C, Lehours P, Tran CT, Leleu A, Raymond J. Molecular characterization of *Helicobacter pylori* resistance to rifamycins. Helicobacter. 2018, 23:e12451.

4. Masaoka T, Suzuki H, Kurabayashi K, Nomoto Y, Nishizawa T, Mori M, et al., Could frameshift mutations in the *frxA* and *rdxA* genes of *Helicobacter pylori* be a marker for metronidazole resistance? Aliment Pharmacol Ther Symposium Series. 2006: Wiley Online Library; 2006: 81-7.

5. Lee SM, Kim N, Kwon YH, Nam RH, Kim JM, Park JY, et al., *rdxa, frxa*, and efflux pump in metronidazole‐resistant *Helicobacter pylori*: Their relation to clinical outcomes. J Gastroenterol Hepatol. 2018, 33:681-8.

6. Marais A, Bilardi C, Cantet F, Mendz GL, Mégraud F. Characterization of the genes *rdxA* and *frxA* involved in metronidazole resistance in *Helicobacter pylori*. Res Microbiol. 2003, 154:137-44.

7. Jeong JY, Mukhopadhyay AK, Dailidiene D, Wang Y, Velapatiño B, Gilman RH, et al., Sequential inactivation of *rdxA* (HP0954) and *frxA* (HP0642) nitroreductase genes causes moderate and high-level metronidazole resistance in *Helicobacter pylori*. J Bacteriol. 2000, 182:5082-90.

8. Binh TT, Suzuki R, Trang TTH, Kwon DH, Yamaoka Y. Search for novel candidate mutations for metronidazole resistance in *Helicobacter pylori* using next-generation sequencing. Antimicrob Agents Chemother. 2015, 59:2343-8.

9. Goodwin A, Kersulyte D, Sisson G, Veldhuyzen van Zanten SJ, Berg DE,et al., Metronidazole resistance in *Helicobacter pylori* is due to null mutations in a gene (*rdxA*) that encodes an oxygen‐insensitive NADPH nitroreductase. Mol Microbiol. 1998, 28:383-93.

10. Tankovic J, Lamarque D, Delchier JC, Soussy CJ, Labigne A, Jenks PJ. Frequent association between alteration of the *rdxA* gene and metronidazole resistance in french and north African isolates of *Helicobacter pylori*. Antimicrob Agents Chemother. 2000, 44:608-13.
